# Supplementary material for: Insight into Codon Utilization Pattern of Tumor Suppressor Gene EPB41L3 from Different Mammalian Species Indicates Dominant Role of Selection Force
Source: MDPI journal article supplement (doi:10.3390/cancers13112739), 2021-06-01
Supplement: s1 [file s1]

Supplementary Materials

# Insight into Codon Utilization Pattern of Tumor Suppressor Gene EPB41L3 from Different Mammalian Species Indicates Dominant Role of Selection Force

Utsang Kumar <sup>1</sup>, Rekha Khandia <sup>1,\*</sup>, Shailja Singhal <sup>1</sup>, Nidhi Puranik <sup>1</sup>, Meghna Tripathi <sup>2</sup>, Atul Kumar Pateriya <sup>2</sup>, Raju Khan <sup>3</sup>, Talha Bin Emran <sup>4</sup>, Kuldeep Dhama <sup>5,\*</sup>, Ashok Munjal <sup>1</sup>, Taha Alqahtani <sup>6</sup> and Ali M. Alqahtani <sup>6</sup>

Table S1. EPB41L3 gene coding sequence dataset.

| SL. No. | Species                  | Sequences/Parameters | Length (Base pairs) |
|---------|--------------------------|----------------------|---------------------|
| 1       | <i>Homo sapiens</i>      | NM_001384704.1       | 2307                |
| 2       |                          | NM_001384692.1       | 2622                |
| 3       |                          | NM_001384685.1       | 3318                |
| 4       |                          | NM_001384691.1       | 2634                |
| 5       |                          | NM_001384696.1       | 2544                |
| 6       |                          | NM_001281533.2       | 2652                |
| 7       |                          | NM_001384682.1       | 2652                |
| 8       |                          | NM_001384703.1       | 2325                |
| 9       |                          | NM_001384697.1       | 2517                |
| 10      |                          | NM_001384699.1       | 2394                |
| 11      |                          | NM_001384706.1       | 2253                |
| 12      |                          | NM_001384684.1       | 2757                |
| 13      |                          | NM_001384693.1       | 2610                |
| 14      |                          | NM_001384698.1       | 2430                |
| 15      |                          | NM_001384705.1       | 2295                |
| 16      |                          | NM_001384695.1       | 2553                |
| 17      |                          | NM_001384688.1       | 2703                |
| 18      |                          | NM_001281534.3       | 2598                |
| 19      |                          | NM_001384700.1       | 2376                |
| 20      |                          | NM_001384689.1       | 2676                |
| 21      |                          | NM_001330557.2       | 2757                |
| 22      |                          | NM_001384690.1       | 2676                |
| 23      |                          | NM_001384686.1       | 2721                |
| 24      |                          | NM_001384687.1       | 2703                |
| 25      |                          | NM_001384694.1       | 2598                |
| 26      |                          | NM_001384683.1       | 2271                |
| 27      |                          | NM_001384702.1       | 2340                |
| 28      |                          | NM_001384701.1       | 2349                |
| 29      |                          | NM_012307.5          | 3264                |
| 30      |                          | NM_001281535.2       | 2271                |
| 31      | <i>Rattus norvegicus</i> | NM_053927.1          | 3318                |
| 32      | <i>Bos taurus</i>        | NM_001206169.1       | 3288                |
| 33      | <i>Mus musculus</i>      | NM_013813.2          | 2790                |
| 34      | <i>Pongo abelii</i>      | NM_001133169.1       | 2430                |

**Table S2.** Nucleotides composition of EPB41L3 gene transcripts (A%, C% U%, and G%) with nucleotides at third position (A3%, C3% U3%, and G3%), overall AU%, GC%, and AU3% composition along with GC12, GC3%, ENc, and CAI analysis.

| Coding Sequences (CDSs)/ Accession number (EPB41L3) | Len gth | A%    | C%    | U%    | G%    | A3%   | C3%   | U3%   | G3%   | AU%   | GC%  | GC1  | GC2  | GC12  | AU3%  | GC3% | ENc  | CAI   |
|-----------------------------------------------------|---------|-------|-------|-------|-------|-------|-------|-------|-------|-------|------|------|------|-------|-------|------|------|-------|
| NM_001384704.1                                      | 2307    | 30.78 | 22.8  | 19.59 | 26.83 | 26.53 | 23.93 | 20.94 | 28.61 | 50.37 | 49.6 | 55.3 | 41.1 | 48.2  | 47.46 | 52.5 | 57.2 | 0.775 |
| NM_001384692.1                                      | 2622    | 29.9  | 23.61 | 19.15 | 27.35 | 25.51 | 23.68 | 20.37 | 30.43 | 49.05 | 51   | 56.3 | 42.4 | 49.35 | 45.88 | 54.1 | 58.4 | 0.771 |
| NM_001384685.1                                      | 3318    | 28.12 | 25.32 | 20.25 | 26.31 | 23.6  | 26.22 | 20.98 | 29.2  | 48.37 | 51.6 | 56.1 | 43.4 | 49.75 | 44.58 | 55.4 | 57.6 | 0.778 |
| NM_001384691.1                                      | 2634    | 30.26 | 23.46 | 18.83 | 27.45 | 25.51 | 23.8  | 20.16 | 30.52 | 49.09 | 50.9 | 56.6 | 41.8 | 49.2  | 45.67 | 54.3 | 57.9 | 0.773 |
| NM_001384696.1                                      | 2544    | 30.07 | 23.62 | 18.83 | 27.48 | 25.35 | 24.17 | 20.05 | 30.42 | 48.9  | 51.1 | 56.5 | 42.2 | 49.35 | 45.4  | 54.6 | 57.7 | 0.773 |
| NM_001281533.2                                      | 2652    | 30.02 | 23.34 | 19.42 | 27.22 | 25.45 | 23.64 | 20.81 | 30.09 | 49.43 | 50.6 | 55.5 | 42.4 | 48.95 | 46.27 | 53.7 | 58.6 | 0.77  |
| NM_001384682.1                                      | 2652    | 30.02 | 23.34 | 19.42 | 27.22 | 25.45 | 23.64 | 20.81 | 30.09 | 49.43 | 50.6 | 55.5 | 42.4 | 48.95 | 46.27 | 53.7 | 58.6 | 0.77  |
| NM_001384703.1                                      | 2325    | 30.49 | 22.67 | 20.26 | 26.58 | 26.45 | 23.74 | 21.68 | 28.13 | 50.75 | 49.2 | 54.1 | 41.8 | 47.95 | 48.13 | 51.9 | 58.3 | 0.771 |
| NM_001384697.1                                      | 2517    | 30.08 | 23.68 | 19.03 | 27.21 | 25.51 | 23.96 | 20.26 | 30.27 | 49.11 | 50.9 | 56.3 | 42.2 | 49.25 | 45.77 | 54.2 | 57.7 | 0.773 |
| NM_001384699.1                                      | 2394    | 30.62 | 22.64 | 20.18 | 26.57 | 26.69 | 23.56 | 21.68 | 28.07 | 50.79 | 49.2 | 54.3 | 41.7 | 48    | 48.37 | 51.6 | 57.8 | 0.773 |
| NM_001384706.1                                      | 2253    | 30.63 | 22.95 | 19.44 | 26.99 | 26.36 | 24.23 | 20.64 | 28.76 | 50.07 | 49.9 | 55.5 | 41.3 | 48.4  | 47    | 53   | 57.1 | 0.775 |
| NM_001384684.1                                      | 2757    | 30.18 | 23.29 | 19.22 | 27.31 | 25.68 | 23.39 | 20.67 | 30.25 | 49.4  | 50.6 | 56   | 42.1 | 49.05 | 46.35 | 53.6 | 58.4 | 0.771 |
| NM_001384693.1                                      | 2610    | 30.19 | 23.45 | 19    | 27.36 | 25.4  | 23.91 | 20.46 | 30.23 | 49.2  | 50.8 | 56.2 | 42.1 | 49.15 | 45.86 | 54.1 | 57.7 | 0.773 |
| NM_001384698.1                                      | 2430    | 30.66 | 22.63 | 20    | 26.71 | 26.67 | 23.46 | 21.48 | 28.4  | 50.66 | 49.3 | 54.7 | 41.5 | 48.1  | 48.15 | 51.9 | 58   | 0.773 |
| NM_001384705.1                                      | 2295    | 30.37 | 22.96 | 19.96 | 26.71 | 26.54 | 23.79 | 21.18 | 28.5  | 50.33 | 49.7 | 54.9 | 41.8 | 48.35 | 47.71 | 52.3 | 58.1 | 0.773 |
| NM_001384695.1                                      | 2553    | 30.12 | 23.66 | 18.88 | 27.34 | 25.5  | 23.85 | 20.09 | 30.55 | 49    | 51   | 56.6 | 42   | 49.3  | 45.59 | 54.4 | 57.9 | 0.773 |
| NM_001384688.1                                      | 2703    | 30.04 | 23.42 | 19.09 | 27.45 | 25.53 | 23.64 | 20.42 | 30.41 | 49.13 | 50.9 | 56.3 | 42.3 | 49.3  | 45.95 | 54.1 | 58.4 | 0.771 |
| NM_001281534.3                                      | 2598    | 30.22 | 23.48 | 18.98 | 27.33 | 25.52 | 23.9  | 20.32 | 30.25 | 49.19 | 50.8 | 56.2 | 42   | 49.1  | 45.84 | 54.2 | 57.7 | 0.773 |
| NM_001384700.1                                      | 2376    | 30.51 | 22.77 | 19.87 | 26.85 | 26.52 | 23.74 | 21.21 | 28.54 | 50.38 | 49.6 | 54.9 | 41.7 | 48.3  | 47.73 | 52.3 | 58.1 | 0.773 |
| NM_001384689.1                                      | 2676    | 30.04 | 23.47 | 19.28 | 27.2  | 25.67 | 23.43 | 20.63 | 30.27 | 49.33 | 50.7 | 56.1 | 42.3 | 49.2  | 46.3  | 53.7 | 58.4 | 0.771 |
| NM_001330557.2                                      | 2757    | 30.18 | 23.29 | 19.22 | 27.31 | 25.68 | 23.39 | 20.67 | 30.25 | 49.4  | 50.6 | 56   | 42.1 | 49.05 | 46.35 | 53.6 | 58.4 | 0.771 |
| NM_001384690.1                                      | 2676    | 30.04 | 23.47 | 19.28 | 27.2  | 25.67 | 23.43 | 20.63 | 30.27 | 49.33 | 50.7 | 56.1 | 42.3 | 49.2  | 46.3  | 53.7 | 58.4 | 0.771 |
| NM_001384686.1                                      | 2721    | 30.14 | 23.3  | 19.37 | 27.2  | 25.69 | 23.48 | 20.84 | 29.99 | 49.5  | 50.5 | 55.7 | 42.3 | 49    | 46.53 | 53.5 | 58.2 | 0.771 |
| NM_001384703                                        | 2703    | 30.04 | 23.42 | 19.09 | 27.45 | 25.53 | 23.64 | 20.42 | 30.41 | 49.13 | 50.9 | 56.3 | 42.3 | 49.3  | 45.95 | 54.1 | 58.4 | 0.771 |

|                    |             |              |               |               |               |               |              |               |               |               |               |               |               |               |               |               |               |               |
|--------------------|-------------|--------------|---------------|---------------|---------------|---------------|--------------|---------------|---------------|---------------|---------------|---------------|---------------|---------------|---------------|---------------|---------------|---------------|
| 687.1              |             |              |               |               |               |               |              |               |               |               |               |               |               |               |               |               |               |               |
| NM_001384<br>694.1 | 2598        | 29.87        | 23.48         | 19.28         | 27.37         | 25.29         | 23.9         | 20.55         | 30.25         | 49.15         | 50.8          | 55.8          | 42.6          | 49.2          | 45.84         | 54.2          | 58.7          | 0.77          |
| NM_001384<br>683.1 | 2271        | 30.74        | 22.81         | 19.77         | 26.68         | 26.55         | 24.04        | 21.14         | 28.27         | 50.51         | 49.5          | 54.8          | 41.3          | 48.05         | 47.69         | 52.3          | 57            | 0.776         |
| NM_001384<br>702.1 | 2340        | 30.47        | 22.78         | 20.04         | 26.71         | 26.54         | 23.85        | 21.41         | 28.21         | 50.51         | 49.5          | 54.5          | 41.9          | 48.2          | 47.95         | 52.1          | 57.8          | 0.774         |
| NM_001384<br>701.1 | 2349        | 30.52        | 22.82         | 20.09         | 26.56         | 26.69         | 23.5         | 21.46         | 28.35         | 50.62         | 49.4          | 54.7          | 41.6          | 48.15         | 48.15         | 51.9          | 58.1          | 0.773         |
| NM_012307<br>.5    | 3264        | 27.97        | 25.46         | 20.16         | 26.41         | 23.44         | 26.47        | 20.77         | 29.32         | 48.13         | 51.9          | 56.2          | 43.6          | 49.9          | 44.21         | 55.8          | 57.6          | 0.778         |
| NM_001281<br>535.2 | 2271        | 30.74        | 22.81         | 19.77         | 26.68         | 26.55         | 24.04        | 21.14         | 28.27         | 50.51         | 49.5          | 54.8          | 41.3          | 48.05         | 47.69         | 52.3          | 57            | 0.776         |
| NM_053927<br>.1    | 3318        | 27.55        | 26.58         | 19.14         | 26.73         | 22.06         | 28.57        | 18.72         | 30.65         | 46.68         | 53.3          | 57.5          | 43.2          | 50.35         | 40.78         | 59.2          | 53.7          | 0.765         |
| NM_001206<br>169.1 | 3288        | 26.67        | 27.65         | 18.25         | 27.43         | 19.8          | 31.48        | 17.06         | 31.66         | 44.92         | 55.1          | 58.6          | 43.5          | 51.05         | 36.86         | 63.1          | 54.7          | 0.74          |
| NM_013813<br>.2    | 2790        | 29.35        | 24.37         | 18.24         | 28.03         | 23.33         | 25.05        | 19.35         | 32.26         | 47.6          | 52.4          | 57            | 42.9          | 49.95         | 42.69         | 57.3          | 54.8          | 0.781         |
| NM_001133<br>169.1 | 2430        | 30.82        | 22.72         | 19.96         | 26.5          | 27.04         | 23.83        | 21.23         | 27.9          | 50.78         | 49.2          | 54.4          | 41.5          | 47.95         | 48.27         | 51.7          | 57.9          | 0.818         |
| <b>Average</b>     | <b>2617</b> | <b>.412</b>  | <b>29.954</b> | <b>23.574</b> | <b>19.422</b> | <b>27.051</b> | <b>25.45</b> | <b>24.304</b> | <b>20.595</b> | <b>29.649</b> | <b>49.375</b> | <b>50.626</b> | <b>55.774</b> | <b>42.144</b> | <b>48.959</b> | <b>46.045</b> | <b>53.953</b> | <b>57.656</b> |
| <b>Value</b>       | <b>±</b>    | <b>±</b>     | <b>±</b>      | <b>±</b>      | <b>±</b>      | <b>±</b>      | <b>±</b>     | <b>±</b>      | <b>±</b>      | <b>±</b>      | <b>±</b>      | <b>±</b>      | <b>±</b>      | <b>±</b>      | <b>±</b>      | <b>±</b>      | <b>±</b>      | <b>0.773</b>  |
| <b>±SD</b>         | <b>299.</b> | <b>0.955</b> | <b>1.115</b>  | <b>0.537</b>  | <b>0.400</b>  | <b>1.474</b>  | <b>1.645</b> | <b>0.877</b>  | <b>1.114</b>  | <b>1.231</b>  | <b>1.237</b>  | <b>0.971</b>  | <b>0.627</b>  | <b>0.741</b>  | <b>2.281</b>  | <b>2.271</b>  | <b>1.132</b>  | <b>± 010</b>  |
|                    | <b>473</b>  |              |               |               |               |               |              |               |               |               |               |               |               |               |               |               |               |               |
